# Supplementary material for: Enhanced photocatalytic activity and charge transfer of a TiO2/BiVO4 nanostructured composite
Source: Royal Society of Chemistry journal article supplement (doi:10.1039/c9cy01482a), 2019-01-01
Supplement: c9cy01482a1.pdf [file c9cy01482a1.pdf]

## Electronic Supporting Information:

### Enhanced Photocatalytic Activity and Charge Transfer of TiO<sub>2</sub>/BiVO<sub>4</sub> Nanostructured Composite

Qiaonan Yu,<sup>a,b</sup> Guoqiang Li \*<sup>a,c</sup> and Feng Zhang<sup>a</sup>

a. Key Laboratory of Photovoltaic Materials of Henan Province, Henan University, Kaifeng 475004, PR China.

b. College of Electronics and Electrical Engineering, Nanyang Institute of Technology, Nanyang 473004, PR China.

c. National Demonstration Center for Experimental Physics and Electronics Education, School of Physics and Electronics, Henan University, Kaifeng 475004, PR China.

\*Corresponding author Email: gqli1980@henu.edu.cn.

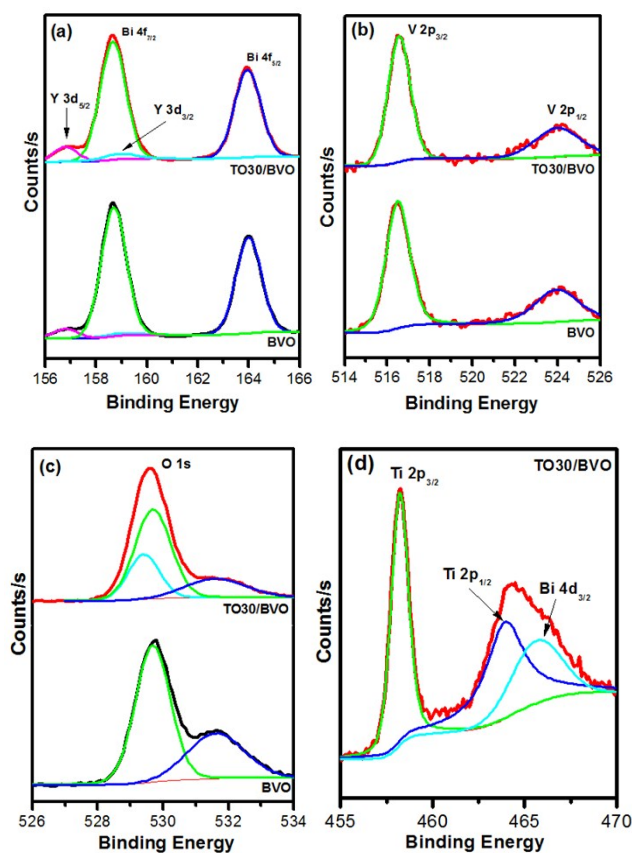

**Figure S1.** High resolution XPS spectra of Bi 4f (a), V 2p (b), O 1s (c) and Ti 2p (d) of BVO and TO30/BVO.

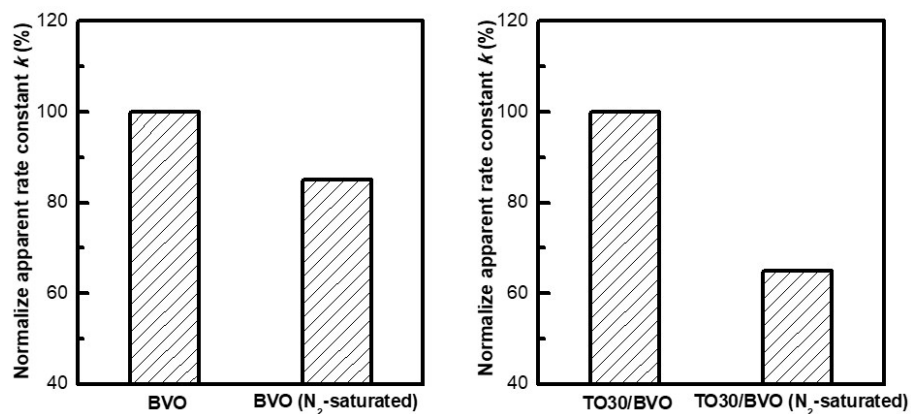

**Figure S2.** Normalize apparent rate constant of BVO and TO30/BVO thin films under common condition and  $N_2$ -saturated condition.

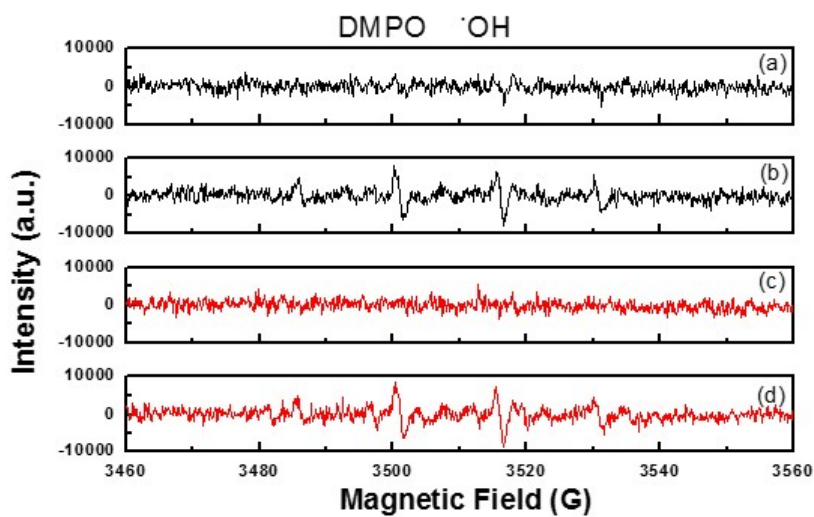

**Figure S3.** DMPO spin trapping EPR spectra for DMPO- $\cdot OH$  with BVO and TO30/BVO samples under dark condition (a, c) and after 6min visible light irradiation (b, d).
